# Supplementary material for: Social Integration and Community Health Participation of Elderly Men in Peri-Urban Ecuador
Source: Ann Glob Health. 2020 Oct 26;86(1):138. doi: 10.5334/aogh.3020 (PMC7597577; doi:10.5334/aogh.3020)
Supplement: Appendix A. — Cuestionario para Participación Social en Hombres. [file agh-86-1-3020-s1.pdf]

## Cuestionario para Participación Social en Hombres

### Criterio de inclusión:

- Hombres mayor que 40 años que viven en Pifo, El Quinche, Tumbaco o Puembo

#### 1. Demografía

- a. Fecha de la entrevista \_\_ - \_\_ - \_\_\_\_
- b. En el caso de que la entrevista la realice un/a cuidador/a
- c. Sexo del/a cuidador/a
  - i. Hombre 0
  - ii. Mujer 1
  - iii. Otrx 2
  - iv. No es aplicable 99
- d. Edad del/a cuidadora \_\_\_\_
- e. Relación con el entrevistado
  - i. Cónyuge 0
  - ii. Yerno/nuera 1
  - iii. Hermano/a 2
  - iv. Amigo/a 3
  - v. Cuñado 4
  - vi. Cuidador/a 5
  - vii. Hijo/a 6
  - viii. Otro/a 7
  - ix. Ns/nc 99
- f. ¿Podría darme su (número) de cédula? \_\_\_\_\_ - \_\_\_\_
- g. ¿Cuál es su nombre? (entrevistado sujeto de estudio)
- h. ¿Puede decirme su edad? \_\_\_\_\_
- i. Fecha de nacimiento \_\_ - \_\_ - \_\_\_\_
- j. Dirección, Barrio
- k. Teléfono
- l. Teléfono contacto (Tipo y de quien)
- m. ¿Cuáles son sus estudios?
  - i. Analfabeto 0
  - ii. Primaria Incompleta 1
  - iii. Primaria 2
  - iv. Secundaria Incompleta 3
  - v. Secundaria 4
  - vi. Universidad Incompleta 5
  - vii. Universidad 6

- n. ¿Usted se considera?
- |                              |    |
|------------------------------|----|
| i. Indígena                  | 0  |
| ii. Afro ecuatoriano (negro) | 1  |
| iii. Mestizo                 | 2  |
| iv. Mulato                   | 3  |
| v. Blanco                    | 4  |
| vi. Montubio                 | 5  |
| vii. Otro                    | 6  |
| viii. Ns/nc                  | 99 |
- o. ¿El lugar donde vive usted...?
- |                            |   |
|----------------------------|---|
| i. Es arrendada/alquilada  | 0 |
| ii. Es su propia           | 1 |
| iii. Pertenece a su hijo/a | 2 |
| iv. Otra                   | 3 |
- p. ¿Vive usted solo?
- |        |   |
|--------|---|
| i. Sí  | 0 |
| ii. No | 1 |
- q. Sí si, ¿Con quien vive?
- 

## 2. Trabajo

- a. ¿Usted trabaja actualmente?
- |                       |   |
|-----------------------|---|
| No, nunca trabajé     | 0 |
| No, jubilado          | 1 |
| No, estoy desempleado | 2 |
| Sí                    | 3 |

## SPHWP Survey

3. ¿Con qué frecuencia hace usted las siguientes actividades?
- a. Sale de la casa para hacer actividades sociales con familia o amigos
- |                     |   |
|---------------------|---|
| Nunca               | 0 |
| Una vez al año      | 1 |
| Cada 2-3 meses      | 2 |
| Una vez al mes      | 3 |
| Una vez a la semana | 4 |
| Casi Todos los días | 5 |
- b. Va a misa o servicios religiosos
- |                     |   |
|---------------------|---|
| Nunca               | 0 |
| Una vez al año      | 1 |
| Cada 2-3 meses      | 2 |
| Una vez al mes      | 3 |
| Una vez a la semana | 4 |
| Casi Todos los días | 5 |
- c. Hace actividad física/deporte con otras personas

|                     |   |
|---------------------|---|
| Nunca               | 0 |
| Una vez al año      | 1 |
| Cada 2-3 meses      | 2 |
| Una vez al mes      | 3 |
| Una vez a la semana | 4 |
| Casi Todos los días | 5 |

d. Otras actividades con amigos o familia como juegos de carta, Bingo, pasatiempos

|                     |   |
|---------------------|---|
| Nunca               | 0 |
| Una vez al año      | 1 |
| Cada 2-3 meses      | 2 |
| Una vez al mes      | 3 |
| Una vez a la semana | 4 |
| Casi Todos los días | 5 |

e. Actividades con la comunidad o el barrio

|                     |   |
|---------------------|---|
| Nunca               | 0 |
| Una vez al año      | 1 |
| Cada 2-3 meses      | 2 |
| Una vez al mes      | 3 |
| Una vez a la semana | 4 |
| Casi Todos los días | 5 |

f. Voluntariado o trabajo de apoyo a la sociedad/comunidad

|                     |   |
|---------------------|---|
| Nunca               | 0 |
| Una vez al año      | 1 |
| Cada 2-3 meses      | 2 |
| Una vez al mes      | 3 |
| Una vez a la semana | 4 |
| Casi Todos los días | 5 |

4. ¿Con qué frecuencia interactúa usted con los siguientes grupos de personas?

a. Con familia?

|                     |   |
|---------------------|---|
| Rara vez            | 0 |
| Una vez al mes      | 1 |
| Una vez a la semana | 2 |
| Casi todos los días | 3 |
| Todos los días      | 4 |

b. Con amigos?

|                     |   |
|---------------------|---|
| Rara vez            | 0 |
| Una vez al mes      | 1 |
| Una vez a la semana | 2 |
| Casi todos los días | 3 |
| Todos los días      | 4 |

c. Con vecinos?

|                     |   |
|---------------------|---|
| Rara vez            | 0 |
| Una vez al mes      | 1 |
| Una vez a la semana | 2 |
| Casi todos los días | 3 |
| Todos los días      | 4 |

Medical Outcomes Study (MOS) Social Support Survey

5. ¿Con qué frecuencia tiene acceso a estos tipos de apoyo? **Apoyo emocional o informativo.**

a. Apoyo de una persona en quien puede confiar si necesita hablar

|              |   |
|--------------|---|
| Nunca        | 0 |
| Pocas veces  | 1 |
| A veces      | 2 |
| Muchas veces | 3 |
| Siempre      | 4 |

b. Apoyo de alguien que le ayuda a comprender una situación o problema

|              |   |
|--------------|---|
| Nunca        | 0 |
| Pocas veces  | 1 |
| A veces      | 2 |
| Muchas veces | 3 |
| Siempre      | 4 |

c. Alguien que le puede aconsejar en una crisis emocional, económica, etc.:

|              |   |
|--------------|---|
| Nunca        | 0 |
| Pocas veces  | 1 |
| A veces      | 2 |
| Muchas veces | 3 |
| Siempre      | 4 |

d. Una persona en quien puede confiar sus problemas:

|       |   |
|-------|---|
| Nunca | 0 |
|-------|---|

|              |   |
|--------------|---|
| Pocas veces  | 1 |
| A veces      | 2 |
| Muchas veces | 3 |
| Siempre      | 4 |

e. Alguien que le aconseja cuando lo necesita:

|              |   |
|--------------|---|
| Nunca        | 0 |
| Pocas veces  | 1 |
| A veces      | 2 |
| Muchas veces | 3 |
| Siempre      | 4 |

f. Alguien en quien puede compartir sus preocupaciones y miedos:

|              |   |
|--------------|---|
| Nunca        | 0 |
| Pocas veces  | 1 |
| A veces      | 2 |
| Muchas veces | 3 |
| Siempre      | 4 |

g. Alguien que le puede aconsejar en un problema personal:

|              |   |
|--------------|---|
| Nunca        | 0 |
| Pocas veces  | 1 |
| A veces      | 2 |
| Muchas veces | 3 |
| Siempre      | 4 |

h. Alguien que entiende sus problemas:

|              |   |
|--------------|---|
| Nunca        | 0 |
| Pocas veces  | 1 |
| A veces      | 2 |
| Muchas veces | 3 |
| Siempre      | 4 |

6. ¿Con qué frecuencia tiene acceso a estos tipos de apoyo? **Apoyo tangible**

a. Alguien que le podría ayudar si usted no pudiera salir de su cama:

|              |   |
|--------------|---|
| Nunca        | 0 |
| Pocas veces  | 1 |
| A veces      | 2 |
| Muchas veces | 3 |
| Siempre      | 4 |

b. Alguien que le puede llevar al médico en caso de estar enfermo:

|              |   |
|--------------|---|
| Nunca        | 0 |
| Pocas veces  | 1 |
| A veces      | 2 |
| Muchas veces | 3 |
| Siempre      | 4 |

c. Alguien que le podría preparar la comida si usted no pudiera hacerlo:

|              |   |
|--------------|---|
| Nunca        | 0 |
| Pocas veces  | 1 |
| A veces      | 2 |
| Muchas veces | 3 |
| Siempre      | 4 |

d. Alguien que le podría ayudar con las tareas diarias, si estuviera enfermo

|              |   |
|--------------|---|
| Nunca        | 0 |
| Pocas veces  | 1 |
| A veces      | 2 |
| Muchas veces | 3 |
| Siempre      | 4 |

e.

7. Con qué frecuencia tienes acceso a estos tipos de apoyo? **Apoyo de cariño**

a. Alguien que le muestra amor y cariño:

|              |   |
|--------------|---|
| Nunca        | 0 |
| Pocas veces  | 1 |
| A veces      | 2 |
| Muchas veces | 3 |
| Siempre      | 4 |

b. Alguien que le hace sentir amado y valorado:

|              |   |
|--------------|---|
| Nunca        | 0 |
| Pocas veces  | 1 |
| A veces      | 2 |
| Muchas veces | 3 |
| Siempre      | 4 |

c. Alguien que le abraza:

|             |   |
|-------------|---|
| Nunca       | 0 |
| Pocas veces | 1 |
| A veces     | 2 |

|              |   |
|--------------|---|
| Muchas veces | 3 |
| Siempre      | 4 |

8. ¿Con qué frecuencia tiene acceso a estos tipos de apoyo? **Interacción Social Positiva**

a. Alguien con quien usted puede pasar un buen rato, un momento feliz, agradable, bonito:

|              |   |
|--------------|---|
| Nunca        | 0 |
| Pocas veces  | 1 |
| A veces      | 2 |
| Muchas veces | 3 |
| Siempre      | 4 |

b. Alguien con quien usted se puede reunir para relajarse:

|              |   |
|--------------|---|
| Nunca        | 0 |
| Pocas veces  | 1 |
| A veces      | 2 |
| Muchas veces | 3 |
| Siempre      | 4 |

c. Alguien con quien puede divertirse:

|              |   |
|--------------|---|
| Nunca        | 0 |
| Pocas veces  | 1 |
| A veces      | 2 |
| Muchas veces |   |
| Siempre      | 4 |

**(para hombres >60 años)**

9. Usted participa en el club de adultos mayores en el centro de salud?

|    |   |
|----|---|
| No | 0 |
| Sí | 1 |

10. Usted participa en algún otro actividad social en su barrio (60 y piquito, etc.)?

|    |   |
|----|---|
| No | 0 |
| Sí | 1 |

(Si no):

a. Por qué no participa?

|                                 |   |
|---------------------------------|---|
| No me interesan las actividades | 0 |
| La hora no es buena para mi     | 1 |
| No tengo medio de transporte    | 2 |
| No sabía del club               | 3 |

|                                   |       |
|-----------------------------------|-------|
| Actividades son solo para mujeres | 4     |
| ...                               |       |
| Otra razón (especificar):         | _____ |

b. ¿Usted iría si hiciéramos otras actividades?

|                                                                 |    |   |
|-----------------------------------------------------------------|----|---|
| ¿Como cuales?                                                   |    |   |
| Póker/40/juego de cartas                                        | 0  |   |
| Mirar futbol                                                    | 1  |   |
| Bingo                                                           | 2  |   |
| Baile                                                           | 3  |   |
| Club de café y discusión                                        | 4  |   |
| Caminar en el parque                                            | 5  |   |
| Obras para la comunidad (como jardinería, ir a guardería, etc.) | 6  |   |
| Hacer/usar cometas                                              | 7  |   |
| Hacer carritos (coches) de madera o resorteras                  |    | 8 |
| Jugar volley                                                    | 9  |   |
| Realizar crucigramas                                            | 10 |   |

c. (Aplica a todos:) Otra ideas para actividades o clubes sociales (especificar):

\_\_\_\_\_

Protocolos Utilizados:

Social Participation and the Health and well-being of Canadian Senior Citizens

[https://www.researchgate.net/publication/232607486\\_Social\\_participation\\_and\\_the\\_health\\_and\\_well-being\\_of\\_Canadian\\_seniors#:~:text=Social%20participation%20and%20the%20health%20and%20well%2Dbeing%20of%20Canadian%20seniors,-Article%20\(PDF%20Available&text=Background%3A%20Social%20participation%20has%20been,well%2Dbeing%20in%20older%20adults.&text=Results%3A%20An%20estimated%2080%25%20of,at%20least%20one%20social%20activity.](https://www.researchgate.net/publication/232607486_Social_participation_and_the_health_and_well-being_of_Canadian_seniors#:~:text=Social%20participation%20and%20the%20health%20and%20well%2Dbeing%20of%20Canadian%20seniors,-Article%20(PDF%20Available&text=Background%3A%20Social%20participation%20has%20been,well%2Dbeing%20in%20older%20adults.&text=Results%3A%20An%20estimated%2080%25%20of,at%20least%20one%20social%20activity.)

Medical Outcomes Study (MOS) Social Support Survey

[https://www.rand.org/health/surveys\\_tools/mos/social-support/survey-instrument.html](https://www.rand.org/health/surveys_tools/mos/social-support/survey-instrument.html)
